# Supplementary material for: Environmental Difference and Spatial Distance Affect the Fidelity of Variation Source of Microbial Community Structure in Air-Dried Soils
Source: MDPI journal article supplement (doi:10.3390/microorganisms10040672), 2022-03-22
Supplement: s1 [file s1]

Day 0 (19 fresh soils)

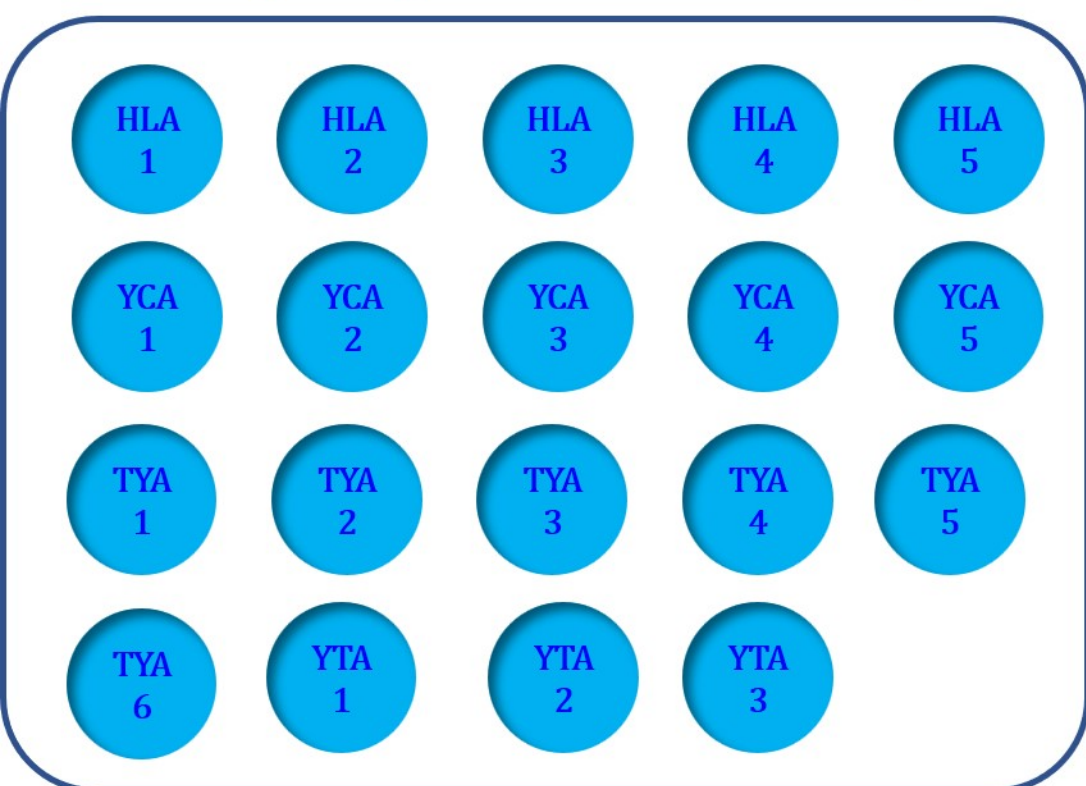

Air-drying and  
preservation

Day 227 (19 air-dried soils)

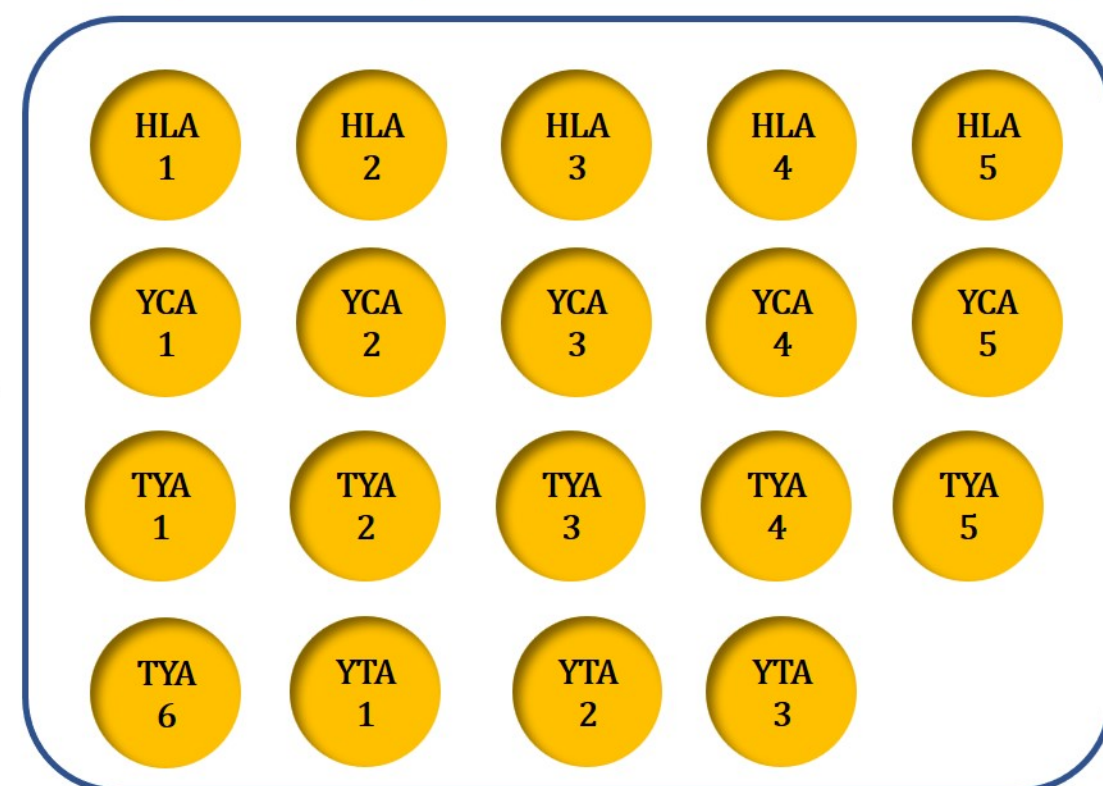

Combinations

$$C_n^2$$

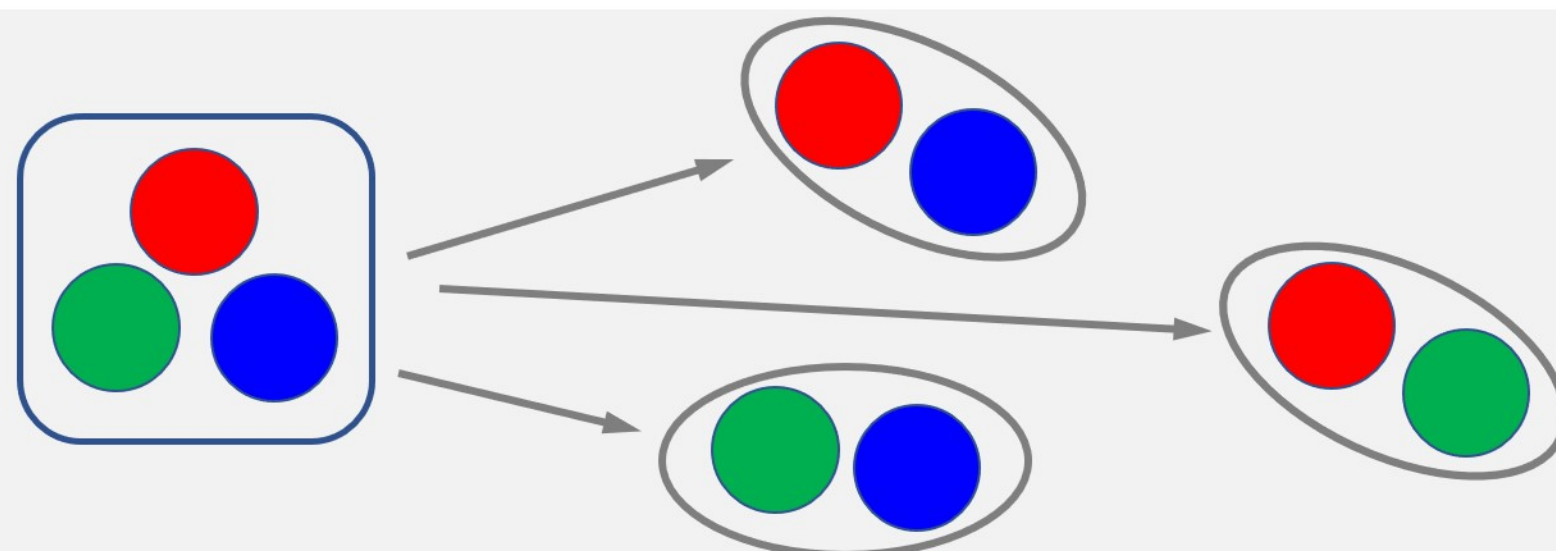

$$C_{19}^2$$

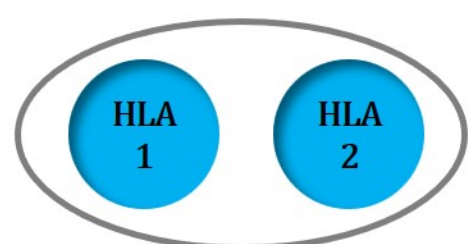

PERMANOVA

$$EP_{fresh}^1$$

$$NDEP^i = \frac{EP_{fresh}^i - EP_{air-dried}^i}{EP_{fresh}^i}$$

$$EP_{air-dried}^1$$

PERMANOVA

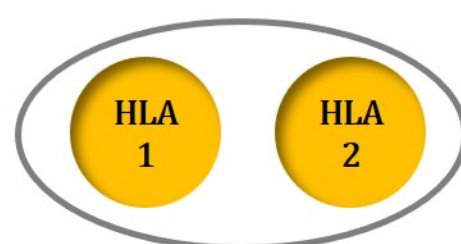

$$C_{19}^2$$

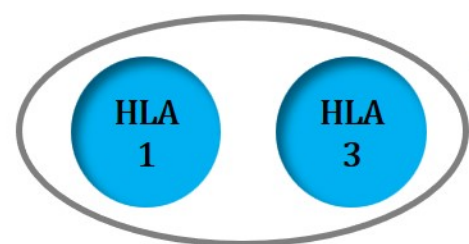

PERMANOVA

$$EP_{fresh}^2$$

$$EP_{air-dried}^2$$

PERMANOVA

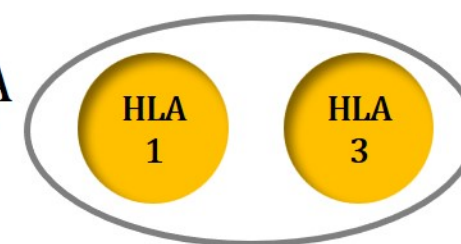

⋮

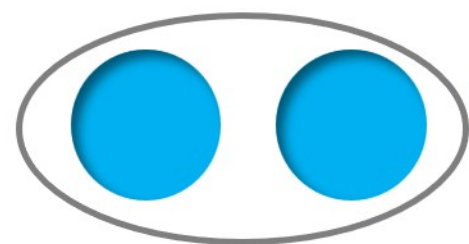

PERMANOVA

$$EP_{fresh}^{171}$$

$$EP_{air-dried}^{171}$$

PERMANOVA

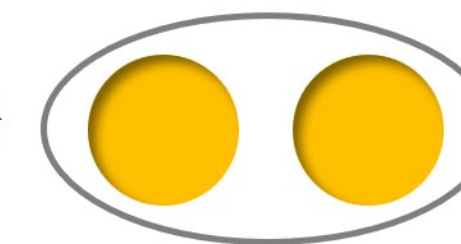

$$NDEP^1$$

$$NDEP^2$$

$$NDEP^{171}$$
