# Supplementary figures and images for: Environmental Difference and Spatial Distance Affect the Fidelity of Variation Source of Microbial Community Structure in Air-Dried Soils
Source: MDPI journal article supplement (doi:10.3390/microorganisms10040672), 2022-03-22

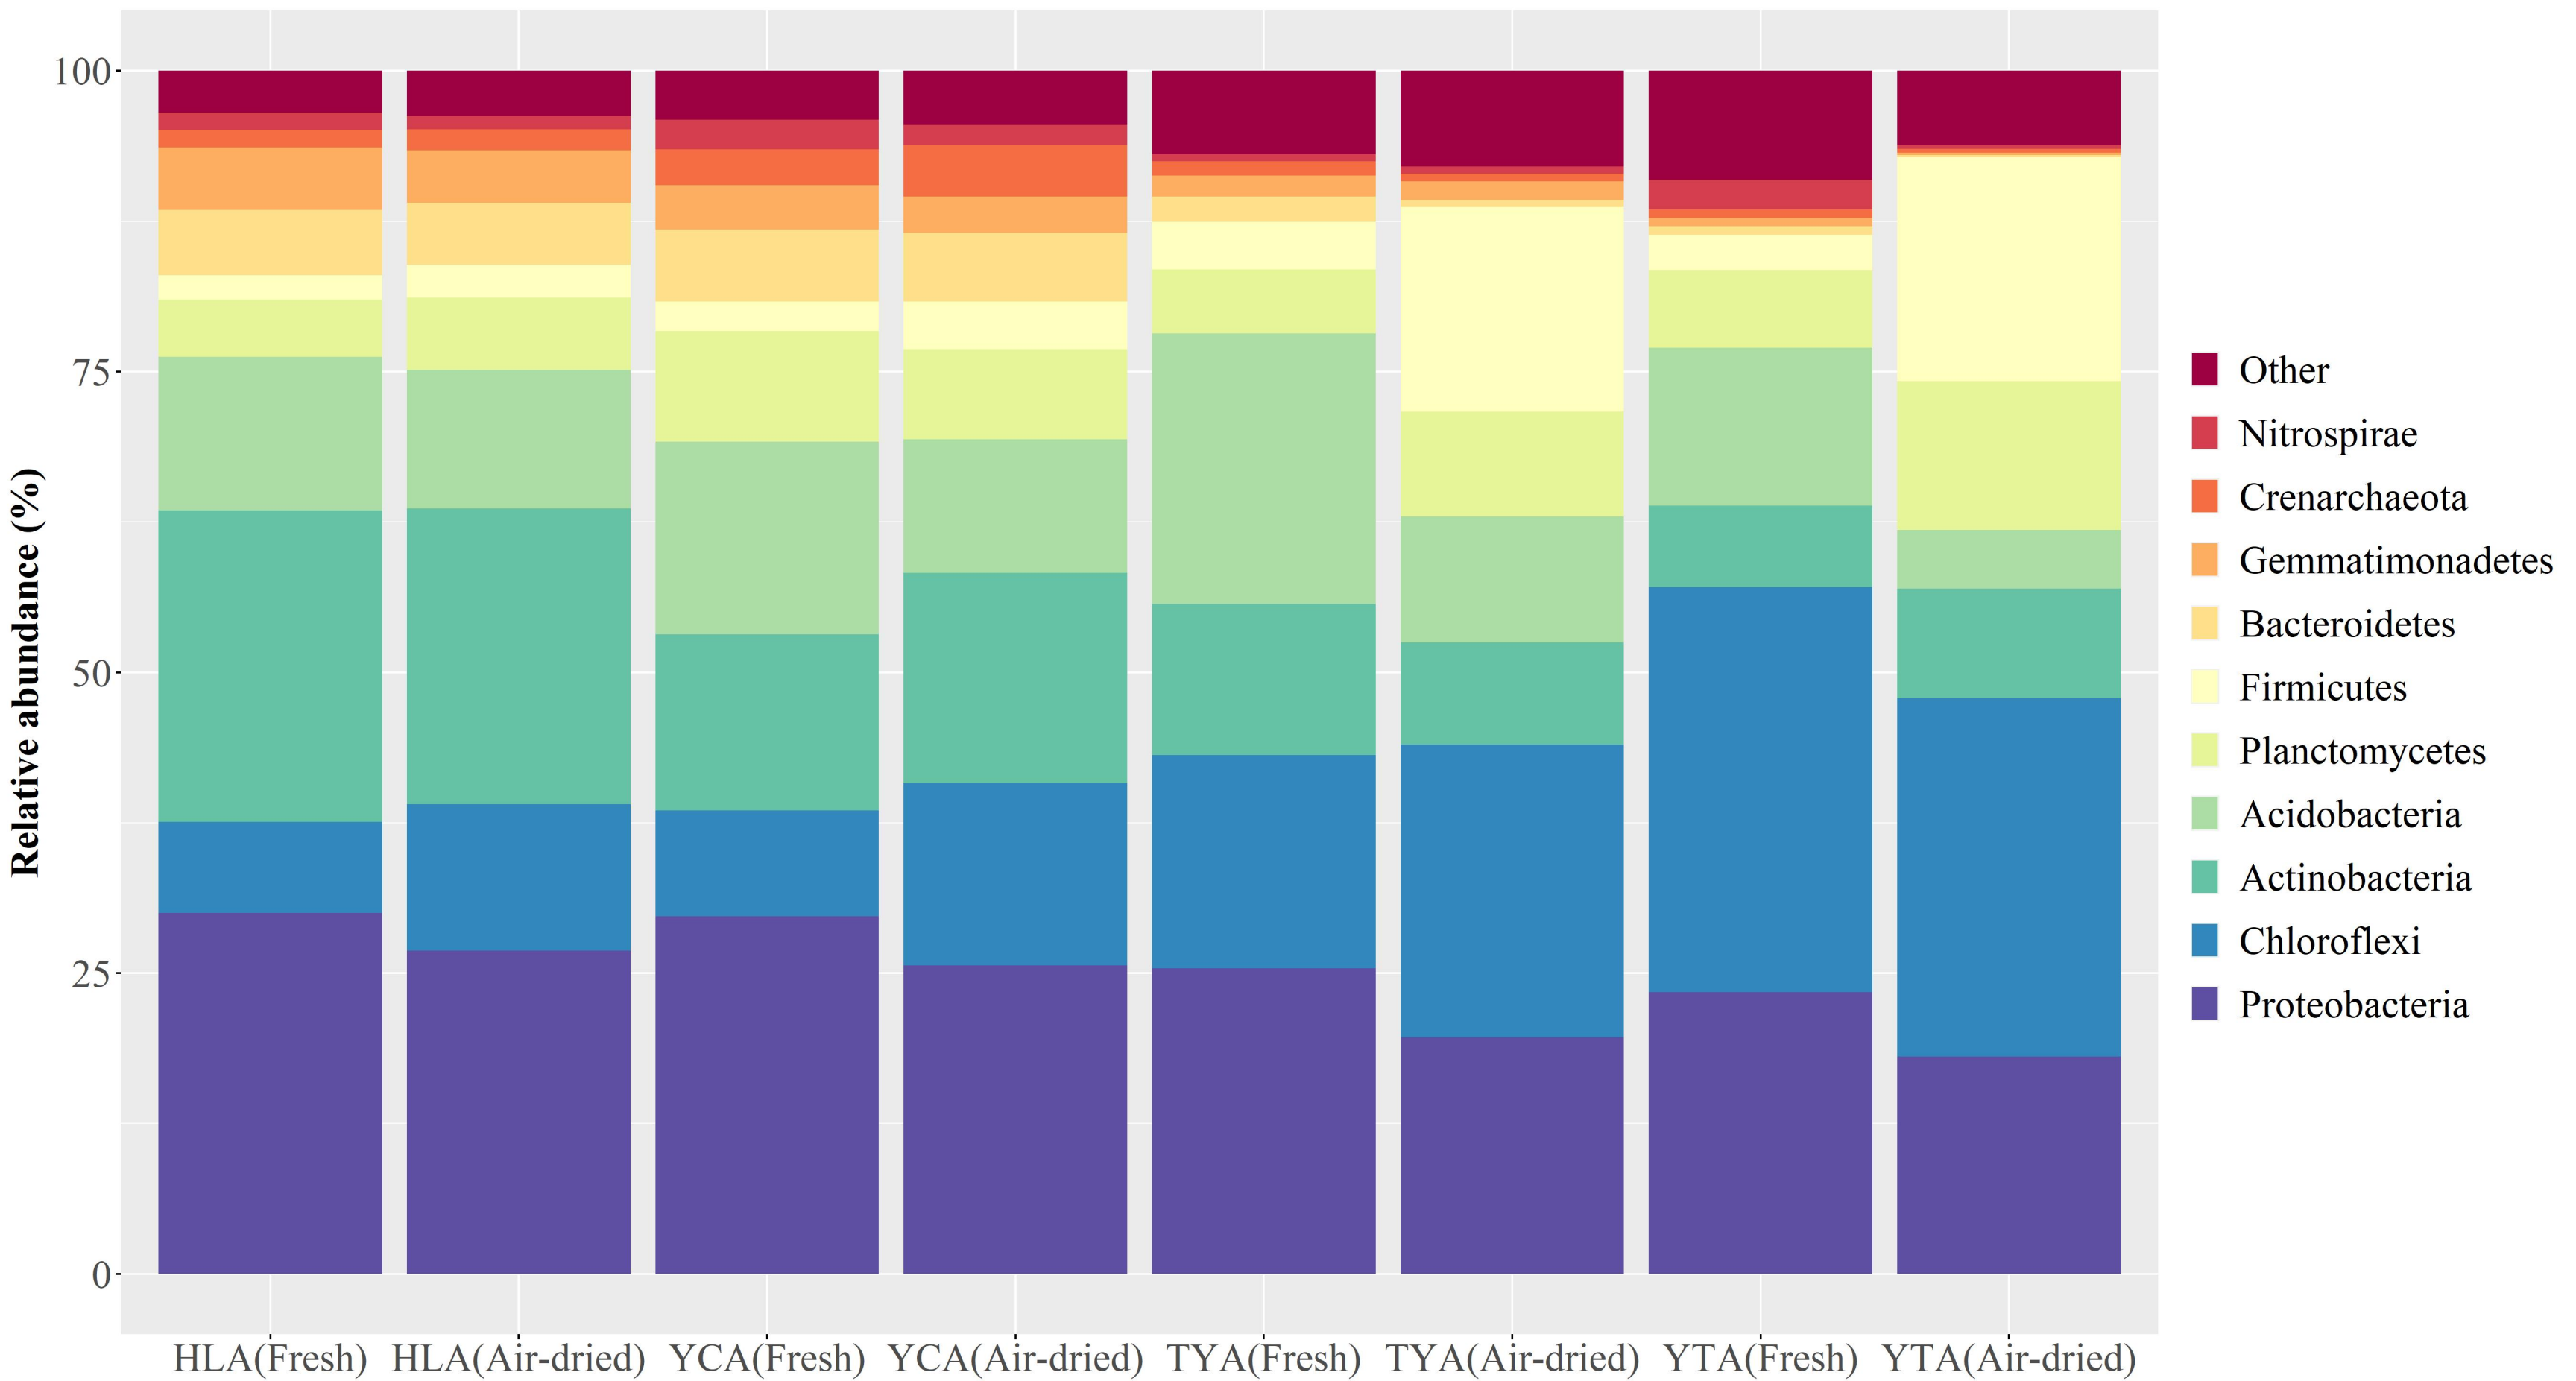

Supplement: s1 [file s1]

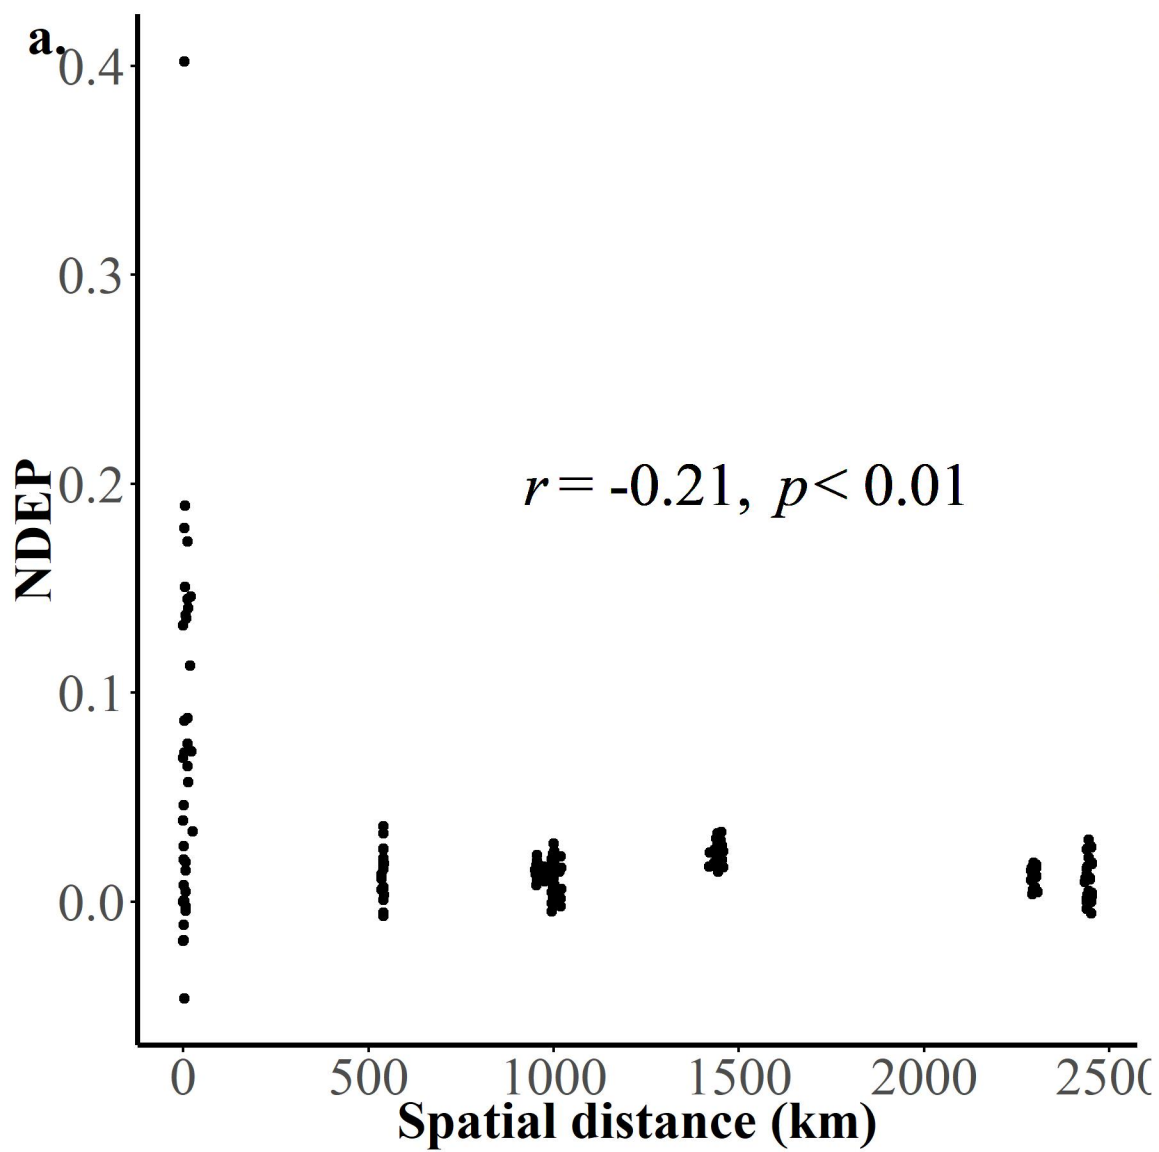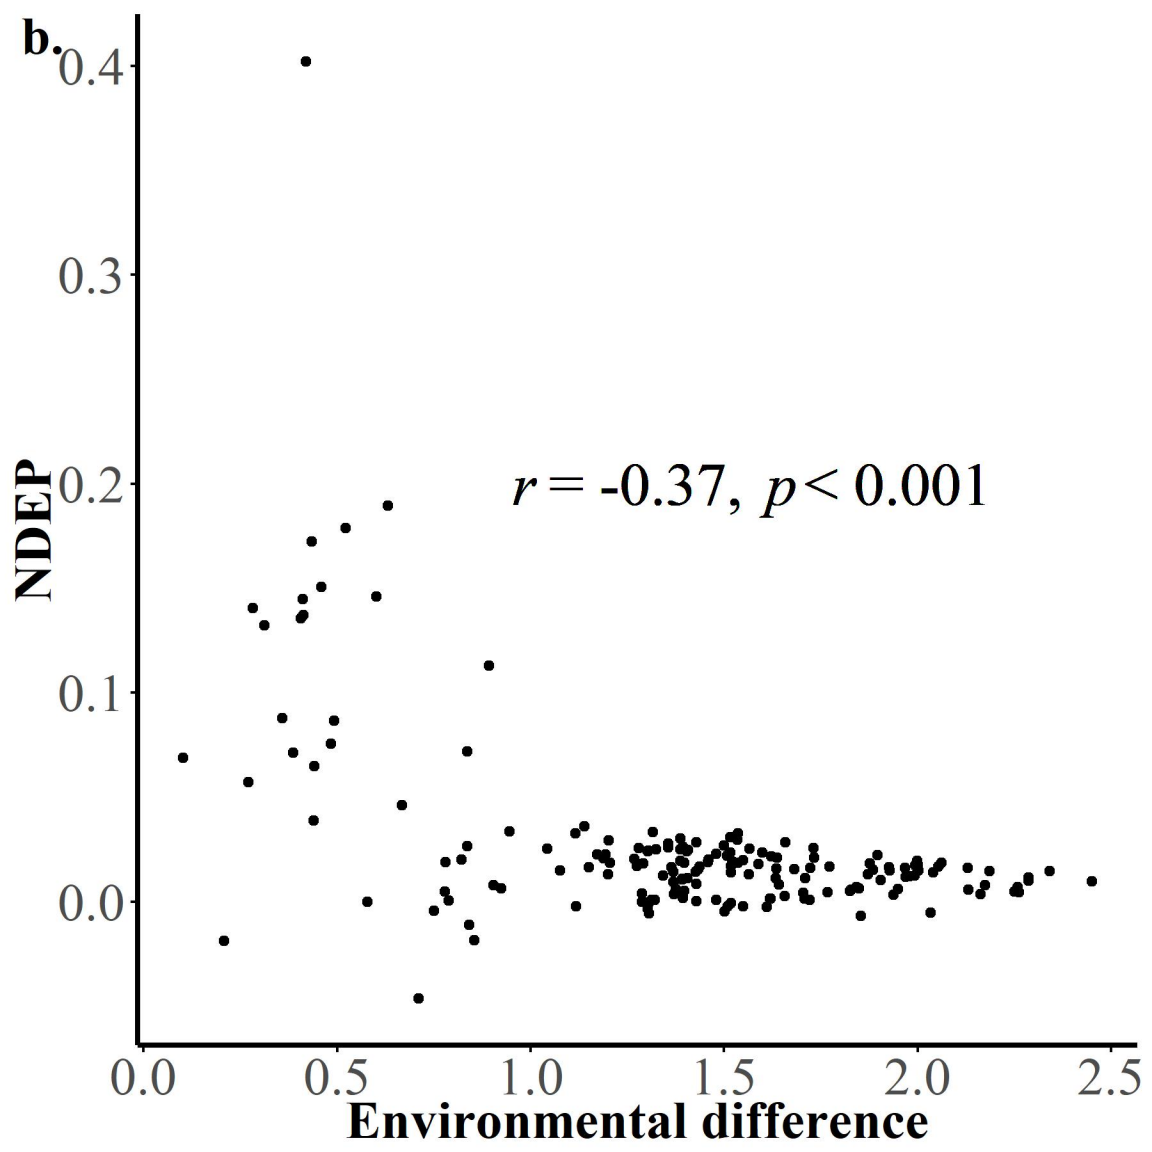

Supplement: s1 [file s1]
